# Supplementary material for: Microfluidic nanoplasmonic-enabled device for multiplex DNA detection
Source: Royal Society of Chemistry journal article supplement (doi:10.1039/c2lc21114a), 2012-01-01
Supplement: c2lc21114a.pdf [file c2lc21114a.pdf]

# Microfluidic nanoplasmonic-enabled device for multiplex DNA detection

*Hsin-I Peng, Christopher M. Strohsahl, and Benjamin L. Miller*

## Supporting Information

**Array Imaging.** With our current imaging (epifluorescence microscope) and microarray setup (inter particle distance of  $\sim 250\ \mu\text{m}$ ), four probe spots can be identified within one fluorescence image under 10X (S1A) objective magnification, and 8 spots under 4X (S1B) objective magnification. By arraying spots in columns, we were able to incorporate two columns of spots into a single channel. One could further decrease the inter-spot distance to accommodate more DNA probe spots into the channel and enhance the sample throughput.

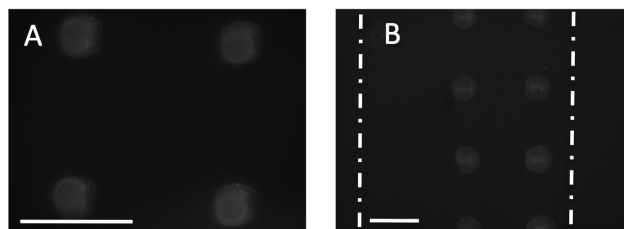

**Figure S1.** Fluorescence microarray images showing DNA hairpin probe spots on the channel floor (under fluidic flow). (A) 10X objective, CCD exposure time: 10 s. (B) 4X objective, CCD exposure time: 20 s. Dotted lines: Channel walls. Scale bar:  $250\ \mu\text{m}$ .

**Design of probe hairpins for *E. coli* and *Enterobacter*.** Probe design was carried out according to the procedure outlined in C. M. Strohsahl, T. D. Krauss and B. L. Miller, *Biosens. Bioelectron.*, 2007, **23**, 233. In brief, segments of genomic DNA obtained from public databases were subjected to secondary structure prediction using the computer program *RNAstructure*. Candidate probes were selected from the secondary structure prediction by visual inspection, then excised from the genomic context and re-subjected to folding. The energy of the duplex was also predicted. The two probes used in this study were chosen based on their strongly favorable predicted folding and duplex-forming energies.

|                                                                                                                                     |
|-------------------------------------------------------------------------------------------------------------------------------------|
| 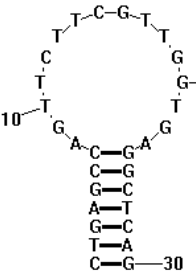                                                   |
| <p>Eco3a<sup>i</sup></p> <p><math>\Delta G = -5.3</math> kcal/mol</p> <p><math>\Delta G_{\text{DUP}} = -41.3</math> kcal/mol</p>    |
|                                                  |
| <p>Entbc3a<sup>ii</sup></p> <p><math>\Delta G = -4.0</math> kcal/mol</p> <p><math>\Delta G_{\text{dup}} = -36.1</math> kcal/mol</p> |

<sup>i</sup> Derived from Genbank M64331.1: Dykhuizen, D.E.; Green, L. "Recombination in *Escherichia coli* and the definition of biological species." *J. Bacteriology*, **1991**, *173*, 7267-7268.

<sup>ii</sup> Derived from Genbank EF123216.1: Son, M.-K.; Hong, S.-J.; Lee, Y.-H. *direct submission*.
